# Supplementary figures and images for: Effect of alkyl chain length and hydroxyl group functionalization on the surface properties of imidazolium ionic liquids
Source: Royal Society of Chemistry journal article supplement (doi:10.1039/c1cp20563c), 2011-01-01

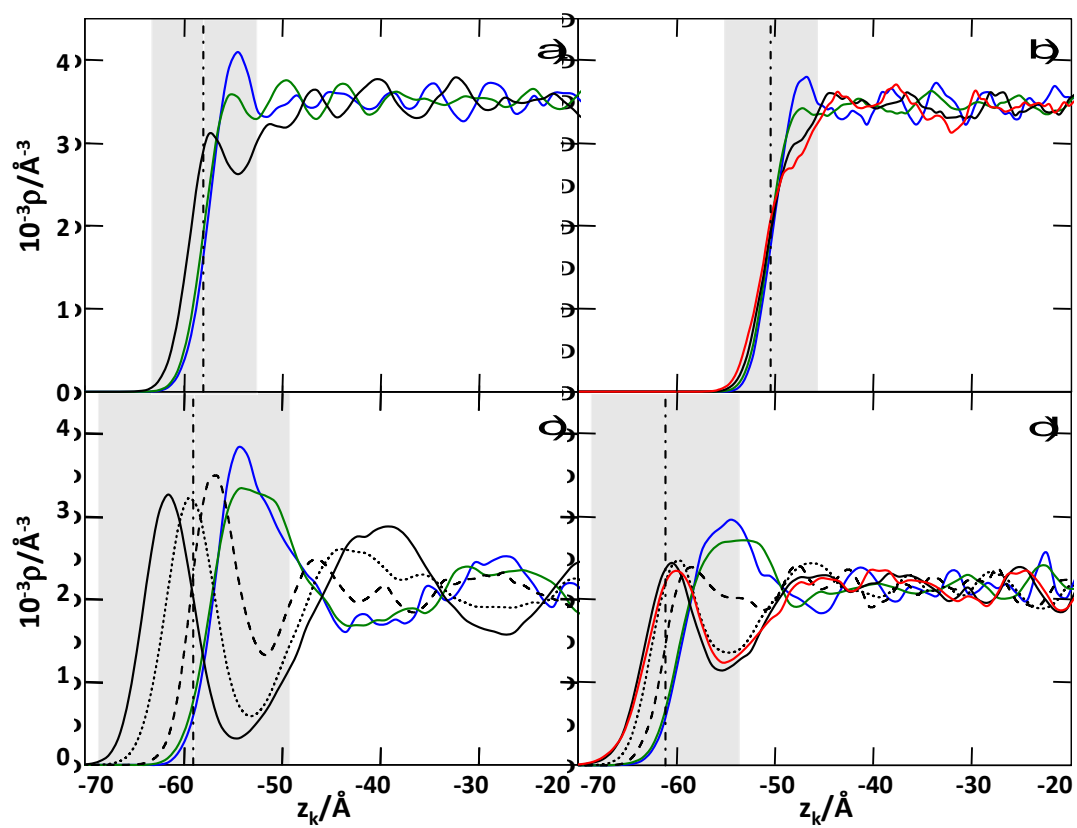

Supplement: c1cp20563c.pdf [file c1cp20563c.pdf]
